# Supplementary material for: Functional diversity of microbial communities in pristine aquifers inferred by PLFA- and sequencing-based approaches
Source: Copernicus journal article supplement (doi:10.5194/bg-14-2697-2017), 2017-05-31
Supplement: Supplementary file 1 [file bg-14-2697-2017-supplement.zip]

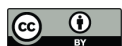

## *Supplement of*

# **Functional diversity of microbial communities in pristine aquifers inferred by PLFA- and sequencing-based approaches**

**Valérie F. Schwab et al.**

*Correspondence to:* Valérie F. Schwab (vf.schwab@uni-jena.de)

- [bg-14-2697-2017-supplement-title-page.pdf](#)
- [Supplement.xlsx](#)

The copyright of individual parts of the supplement might differ from the CC-BY 3.0 licence.
